# Supplementary material for: Early Detection of Mycobacterium avium subsp. paratuberculosis Infected Cattle: Use of Experimental Johnins and Innovative Interferon-Gamma Test Interpretative Criteria
Source: Frontiers journal article supplement (doi:10.3389/fvets.2021.638890), 2021-05-14
Supplement: Data_Sheet_1.PDF [file Data_Sheet_1.PDF]

## Supplementary Material

**Table S1** Results of paratuberculosis (PTB) diagnosis with traditional test considered in parallel (serology/polymerase chain reaction/culture) and with interferon (IFN)- $\gamma$  test derived from the six best interpretative criteria.

|               |       | PTB |    |       |
|---------------|-------|-----|----|-------|
|               |       | P   | N  | Total |
| IFN- $\gamma$ | P     | 59  | 6  | 65    |
|               | N     | 12  | 10 | 22    |
|               | Total | 71* | 16 | 87    |

*P, positive; N, negative. \*In the statistical analysis, in order to estimate the sensitivity, out of 71 PTB-positive subjects, 4 animals were excluded due to high optical density values of the phosphate buffered solution.*

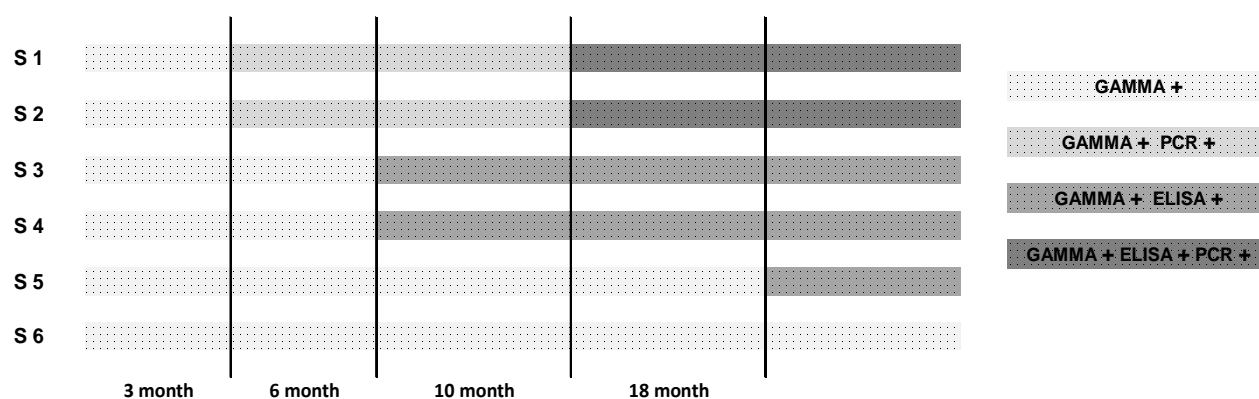

**Figure S1.** Timeline in six subjects positive only on interferon (IFN)- $\gamma$  test, five of which became positive, during the follow-up, to serology (gamma + / ELISA +); to polymerase chain reaction (gamma + / PCR +); to serology and polymerase chain reaction (gamma + / ELISA + / PCR +) in the next 18 months.

**Table S2** ROC Association Statistics according to DeLong's test, relative to data reported in the Figure 3.

| ROC Model | Mann-Whitney |                |                            |        | Somers' D | Gamma  | Tau-a  |
|-----------|--------------|----------------|----------------------------|--------|-----------|--------|--------|
|           | AUC          | Standard Error | 95% Wald Confidence Limits |        |           |        |        |
| PPDJA     | 0.9358       | 0.0246         | 0.8876                     | 0.9839 | 0.8715    | 0.8735 | 0.4382 |
| PPDJB     | 0.9341       | 0.0228         | 0.8894                     | 0.9787 | 0.8681    | 0.8722 | 0.4365 |
| PPDA      | 0.8942       | 0.0317         | 0.8321                     | 0.9563 | 0.7884    | 0.7901 | 0.3964 |

*PPDJA, PPD Johnin strain A; PPDJB, PPD Johnin strain B; PPDA, Avian PPD; ROC, receiver operating characteristic; AUC, area under the curve*

**Table S3** ROC Contrast Estimation and Testing Results by Row according to DeLong's test, relative to data reported in the Figure 3.

| Contrast            | Estimate | Standard Error | 95% Wald Confidence Limits |        | Chi-Square | Pr > ChiSq |
|---------------------|----------|----------------|----------------------------|--------|------------|------------|
| <b>PPDJA - PPDA</b> | 0.0416   | 0.0127         | 0.0166                     | 0.0666 | 10.6580    | 0.0011     |
| <b>PPDJB - PPDA</b> | 0.0399   | 0.0174         | 0.00578                    | 0.0740 | 5.2535     | 0.0219     |

*PPDJA, PPD Johnin strain A; PPDJB, PPD Johnin strain B; PPDA, Avian PPD; ROC, receiver operating characteristic.*
